# Supplementary material for: Peripheral vaccination-induced brain-resident memory CD8+ T cells durably protect mice against intracranial malignancy
Source: JCI journal article supplement (doi:10.1172/jci197812), 2026-04-15
Supplement: sd1 [file 1]

## Supplemental Figures.

**A**

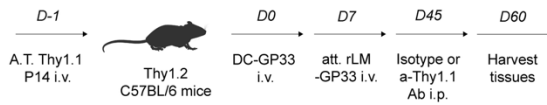

**B**

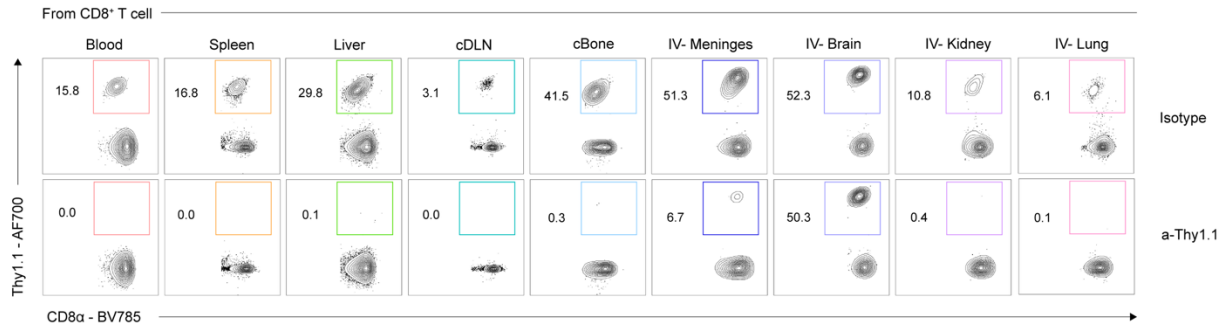

**C**

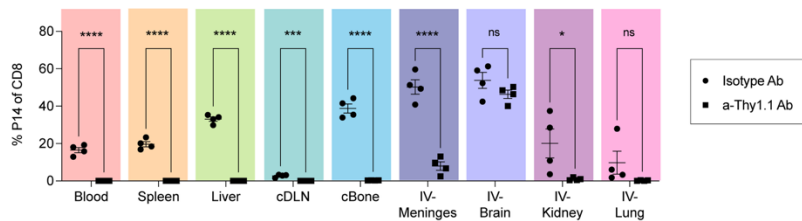

### Supplemental Figure 1. a-Thy1.1 antibody treatment systemically depletes TCR-tg T cells while preserving brain T<sub>RM</sub>.

**(A)** Experimental design. Thy1.2 C57BL/6N mice were adoptively transferred with  $2 \times 10^4$  Thy1.1 P14 intravenously (i.v.) one day prior to i.v. injection with GP<sub>33-41</sub> peptide-pulsed, LPS-matured dendritic cells (DC-GP33). After DC prime, mice were boosted with attenuated recombinant *Listeria monocytogenes* expressing GP<sub>33-41</sub> (att. rLM-GP33). At a memory timepoint 45 days after DC prime, mice were treated with 2  $\mu$ g of isotype control or a-Thy1.1 antibody intraperitoneally (i.p.) to deplete P14 memory T cells in select tissues. Approximately 3 minutes prior to tissue harvest on D60, mice were injected intravenously with a fluorophore conjugated anti-CD45 antibody to distinguish P14 T cells in the vasculature (IV+) versus P14 T cells localized in tissues (IV-) at the time of isolation. **(B)** Representative flow plots of Thy1.1<sup>+</sup> CD8<sup>+</sup> T cells in the blood, spleen, liver, cervical draining lymph nodes (cDLN), cranial bone (cBone), IV- meninges, IV- brain, IV- kidney, and IV- lung following isotype or a-Thy1.1 antibody treatment. **(C)** Frequency of Thy1.1<sup>+</sup> P14 T cells in respective tissues following antibody treatments. Experiments in **(B-C)** show representative data from 1 independent experiment with n=4 mice per group. Statistical significance was determined by student's t-test. Graphs show the mean  $\pm$  s.e.m. with each symbol representing one mouse. Individual *p* values are summarized as: \**p* < 0.05, \*\**p* < 0.01, \*\*\**p* < 0.001, \*\*\*\**p* < 0.0001. Graphical illustrations were created using BioRender (<https://biorender.com>).

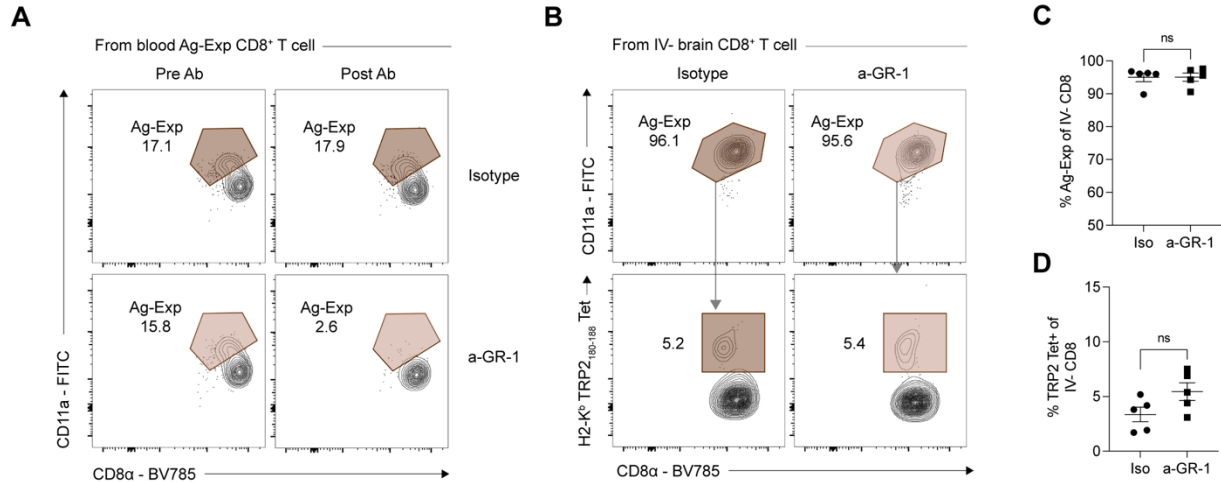

**Supplemental Figure 2. a-GR-1 antibody treatment effectively depletes  $T_{CIRC}$  while preserving brain  $T_{RM}$ .** (A) Representative flow plot of CD11a<sup>hi</sup> Ag-Exp CD8<sup>+</sup> T cells in the blood of DC-rLM-TRP2 prime-boosted mice pre- and post- antibody treatment with isotype control or a-GR-1 antibodies. (B) Representative flow plot of Ag-Exp CD8<sup>+</sup> T cells and TRP2<sub>180-188</sub>-specific CD8<sup>+</sup> T cells in the IV- brain from DC-rLM-TRP2 prime-boosted mice 10 days following isotype or a-GR-1 antibody treatment. (C) Frequency of Ag-Exp CD8<sup>+</sup> T cells and (D) TRP2<sub>180-188</sub>-specific CD8<sup>+</sup> T cells in the IV- brain after antibody treatments. Experiments in (A) show representative data from 2 independent experiments with n=7-9 mice per group total. Experiments in (B-D) show representative data from 1 of 2 independent experiments with n=5 mice per group. Statistical significance was determined by student's t-test. Graphs show the mean  $\pm$  s.e.m. with each symbol representing one mouse.

**A**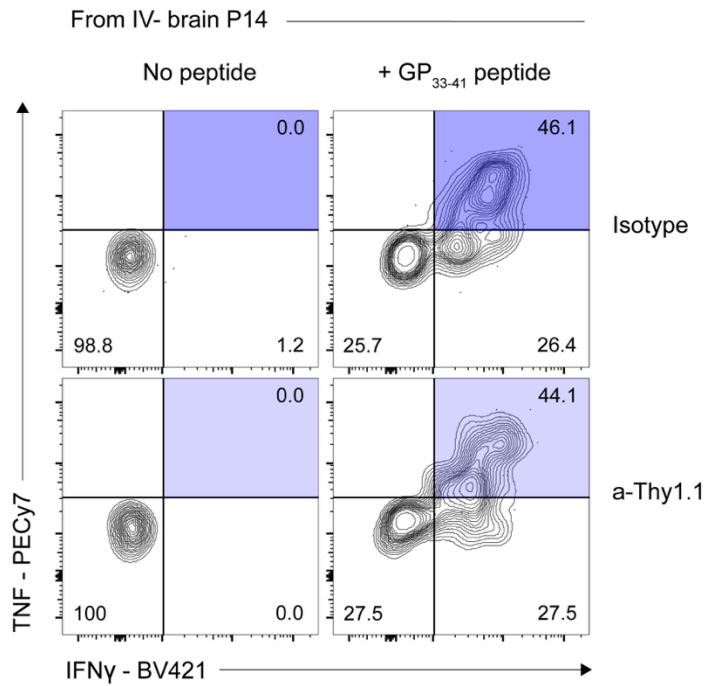**B**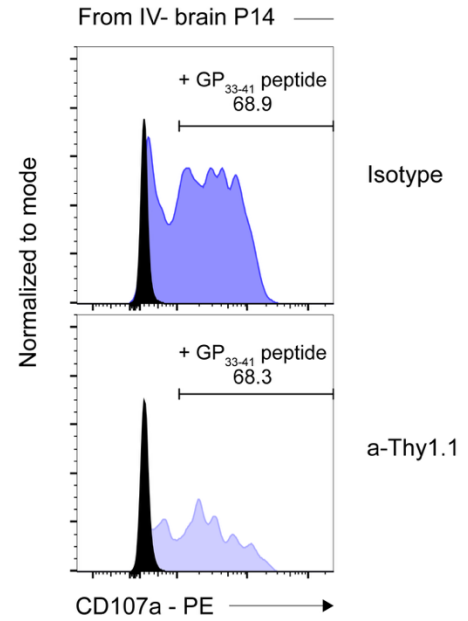

**Supplemental Figure 3. Representative gating of cytokine production and cytolytic capacity of brain T<sub>RM</sub> following ex vivo GP<sub>33-41</sub> peptide stimulation. (A)** Expression of IFN- $\gamma$  and TNF among IV- brain P14 following 5-6-hour ex vivo 200 nM GP<sub>33-41</sub> peptide stimulation or no peptide control in B16-GP33 and LCMV i.c. surviving mice previously treated with isotype or a-Thy1.1 antibodies. **(B)** Expression of CD107a among IV- brain P14 following peptide stimulation or no peptide control (black histograms).

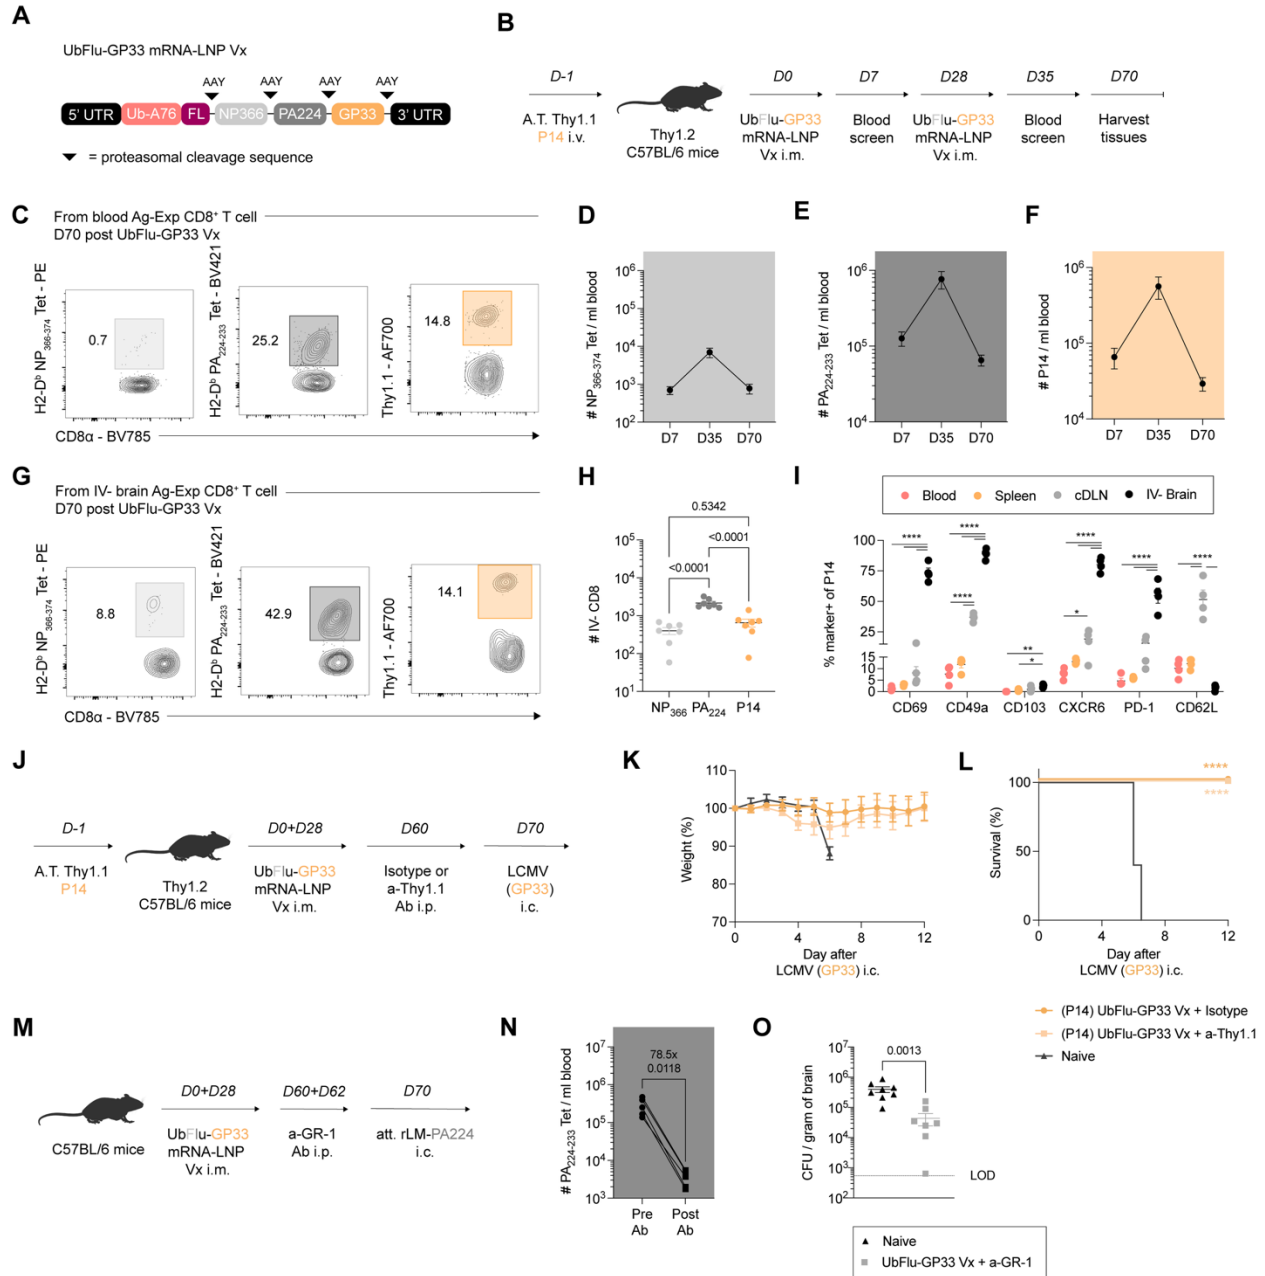

**Supplemental Figure 4. Peripheral mRNA-LNP vaccination generates protective virus-specific brain T<sub>RM</sub>.** (A) Construct design. Same as in Figure 5 but with NP<sub>366-374</sub>, PA<sub>224-233</sub>, and GP<sub>33-41</sub> coding sequences. (B) Thy1.2 C57BL/6N mice were adoptively transferred with  $2 \times 10^4$  Thy1.1 P14 i.v. and immunized one day later with  $5 \mu\text{g}$  UbFlu-GP33 mRNA-LNP vaccine (Vx) i.m. with boosting 28 days later. (C) Tetramer and Thy1.1<sup>+</sup> P14 virus-specific CD8<sup>+</sup> T cell staining. (D-F) Number of virus-specific CD8<sup>+</sup> T cells in blood across time. (G) Representative staining and (H) numbers of virus-specific CD8<sup>+</sup> T cells in the IV- brain. (I) T<sub>RM</sub>-associated marker expression among P14. (J) Mice were vaccinated as in (B), treated i.p. with isotype or anti-Thy1.1 antibody (Ab) to deplete P14 T<sub>CIRCM</sub>, and challenged i.c. with LCMV. (K) Weight loss and (L) survival after LCMV i.c. challenge. (M) C57BL/6N mice were immunized, treated with a-GR-1 Ab i.p. to deplete T<sub>CIRCM</sub>, and challenged i.c. with att. rLM-PA<sub>224-233</sub>. (N) Number of H2-D<sup>b</sup> PA<sub>224-233</sub> Tet<sup>+</sup> CD8<sup>+</sup> T cells / ml of blood. (O) rLM-PA<sub>224-233</sub> colony forming units (CFU) / gram of

brain tissue with limit of detection (LOD) noted. Experiments in **(A-H; O)** show concatenated data from 2 independent experiments with n=7-15 mice per group total. Experiments in **(K-L)** show concatenated data from 3 independent experiments with n=7-10 mice per group total. Experiments in **(I; N)** show data from 1 of 2 independent experiments with n=4-5 mice. Statistical significance was determined by Student's t-test, paired t-test, one-way ANOVA with Tukey's multiple comparison's test, or log-rank test for survival curves compared to naïve mice. Graphs show the mean  $\pm$  s.e.m. with each symbol representing one mouse. Individual  $p$  values are noted on respective graphs or are otherwise summarized as: \* $p < 0.05$ , \*\* $p < 0.01$ , \*\*\* $p < 0.001$ , \*\*\*\* $p < 0.0001$ . Graphical illustrations were created using BioRender (<https://biorender.com>).

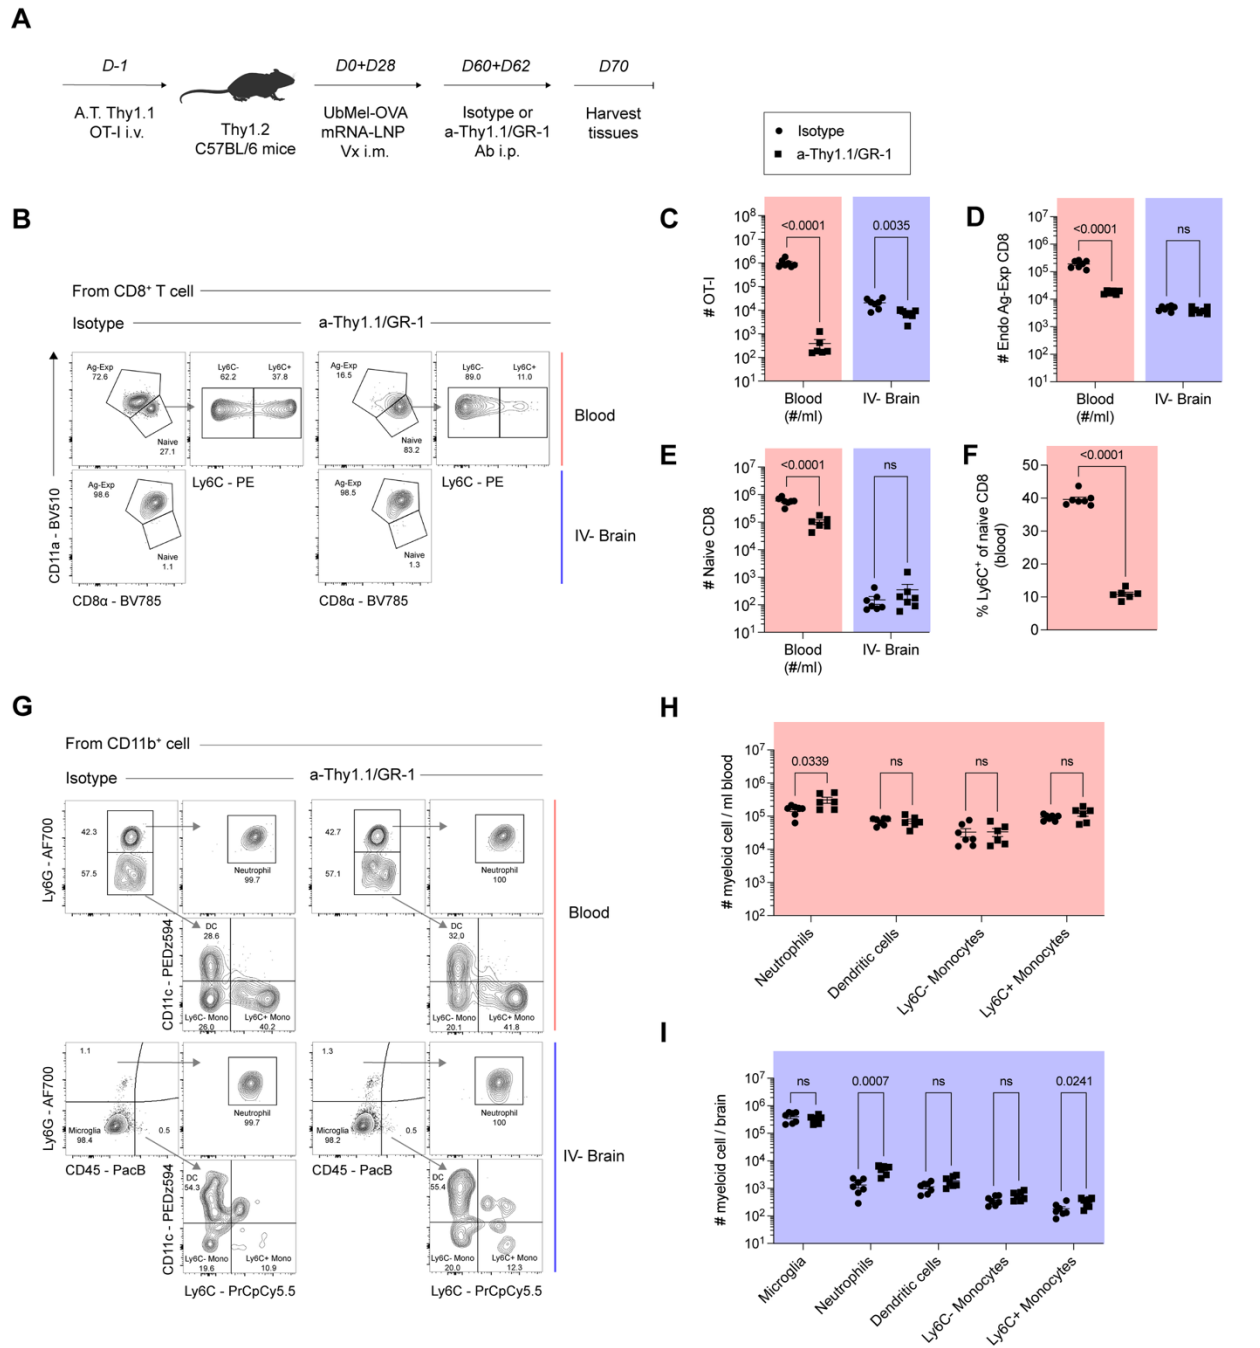

**Supplemental Figure 5. Combination a-Thy1.1/GR-1 antibody depletion impact on CD8<sup>+</sup> T cell and myeloid cell compartments. (A)** Experimental design. Thy1.2 C57BL/6N mice were adoptively transferred with  $10^4$  Thy1.1 OT-I i.v. and immunized one day later with  $5 \mu\text{g}$  UbMel-OVA mRNA-LNP vaccine (Vx) i.m. Mice were boosted 28 days later with  $5 \mu\text{g}$  UbMel-OVA mRNA-LNP vaccine ipsilaterally i.m. At 60 and 62 days after initial immunization, mice were treated i.p. with isotype control antibody or a combination of  $2 \mu\text{g}$  a-Thy1.1 /  $200 \mu\text{g}$  a-GR-1 antibodies to broadly deplete TCR-tg and endogenous  $T_{\text{CIRC}}$ . After 70 days, tissues were harvested. **(B)** Representative gating of antigen-experienced (Ag-Exp) and naïve CD8<sup>+</sup> T cells in the blood and IV- brain following antibody depletion. **(C)** Number of OT-I, **(D)** endogenous Ag-Exp CD8<sup>+</sup> T cells, and **(E)** naïve CD8<sup>+</sup> T cells in the blood and IV- brain of antibody treated

hosts. **(F)** Frequency of Ly6C<sup>+</sup> naïve CD8<sup>+</sup> T cells in the blood. **(G)** Representative gating of CD11b<sup>+</sup> myeloid cells in the blood and IV- brain of antibody treated hosts. **(H)** Number of neutrophils, dendritic cells, Ly6C<sup>-</sup> monocytes, and Ly6C<sup>+</sup> monocytes in the blood of antibody treated hosts. **(I)** Same as (H) but for IV- brain samples encompassing microglia populations. Experiments in **(A-I)** show concatenated data from 2 independent experiments with n=7-8 mice per group total dependent on tissue type. Statistical significance was determined by Student's t-test. Graphs show the mean  $\pm$  s.e.m. with each symbol representing one mouse. Individual *p* values are noted on respective graphs. Graphical illustrations were created using BioRender (<https://biorender.com>).

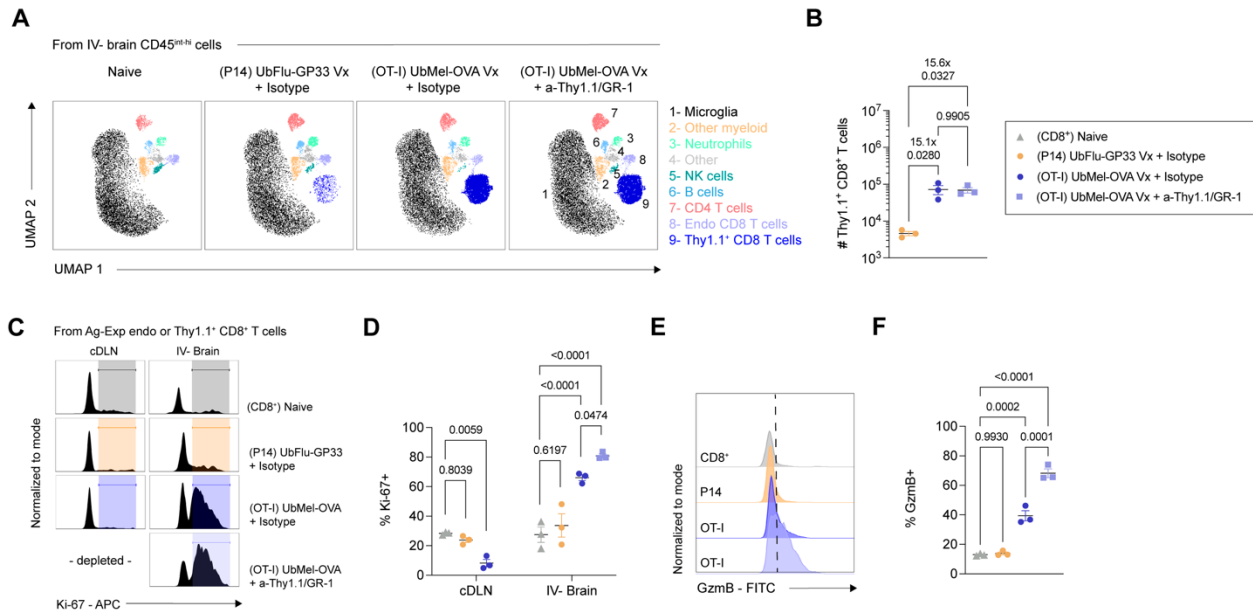

**Supplemental Figure 6. Tumor-specific brain T<sub>RM</sub> exhibit enhanced proliferative and cytolytic capacities acutely after tumor challenge.** (A) Uniform manifold approximation and projection (UMAP) representations of 45,000 downsampled IV- brain CD45<sup>int-hi</sup> cells per group concatenated from n=3 representative mice via flow cytometry 7 days after GL261-QUAD-Luc i.c. challenge. (B) Number of IV- Thy1.1<sup>+</sup> CD8<sup>+</sup> T cells in the brains of UbFlu-GP33 or UbMel-OVA vaccinated mice. (C) Representative histograms and (D) gMFI of Ki-67 expression among endogenous CD8<sup>+</sup> or Thy1.1<sup>+</sup> CD8<sup>+</sup> T cells in the cDLN or IV- brain of naïve or vaccinated mice. (E) Representative histograms and (F) gMFI of granzyme B (GzmB) expression among CD8<sup>+</sup> or Thy1.1<sup>+</sup> CD8<sup>+</sup> T cells in the IV- brain of naïve or vaccinated mice. Experiments in (A-F) show data from 1 independent experiment. Statistical significance was determined by one-way ANOVA with Tukey's multiple comparison's test. Graphs show the mean ± s.e.m. with each symbol representing one mouse. Individual *p* values are noted on respective graphs.

**A**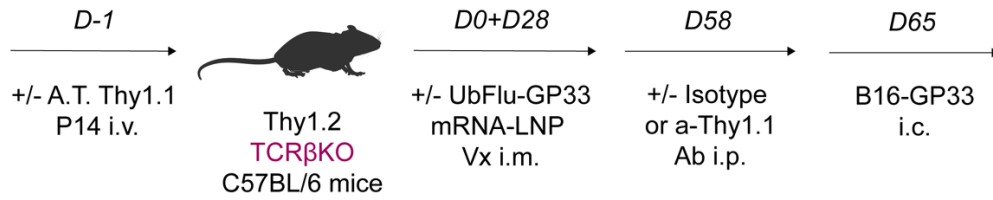**B**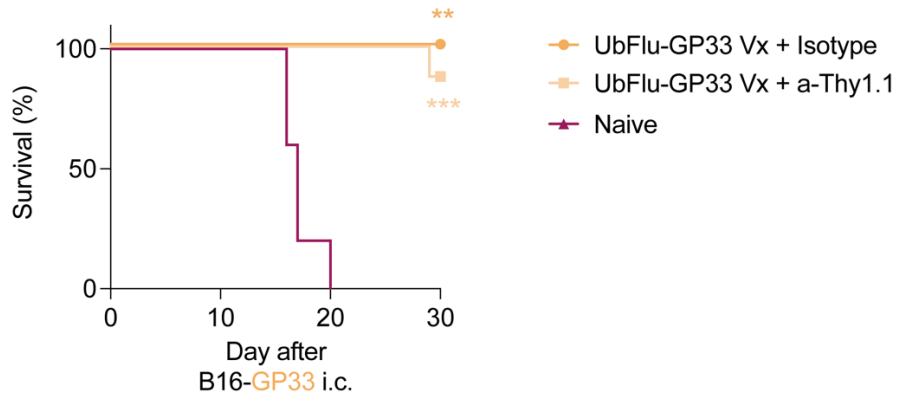

**Supplemental Figure 7. T<sub>RM</sub>-mediated protection against intracranial malignancy occurs independently of a peripheral T cell compartment.** (A) Experimental design. Thy1.2 TCR $\beta$ KO C57BL/6N mice were adoptively transferred with  $2 \times 10^4$  Thy1.1 P14 i.v. and immunized one day later with  $2.5 \mu\text{g}$  UbFlu-GP33 mRNA-LNP vaccine i.m. Mice were ipsilaterally boosted 28 days later. At 58 days after initial immunization, mice were treated i.p. with  $2 \mu\text{g}$  of isotype control or a-Thy1.1 antibody to deplete P14 T<sub>CIRC</sub>. After 65 days, mice were injected i.c. with B16-GP33 cells. (B) Kaplan-Meier survival curves of mice injected with B16-GP33 i.c. Experiments in (B) show data from 1 of 2 independent experiments with  $n=5-8$  mice. Statistical significance was determined by log-rank test for survival curves compared to naïve mice. Individual  $p$  values are summarized as: \* $p < 0.05$ , \*\* $p < 0.01$ , \*\*\* $p < 0.001$ , \*\*\*\* $p < 0.0001$ . Graphical illustrations were created using BioRender (<https://biorender.com>).

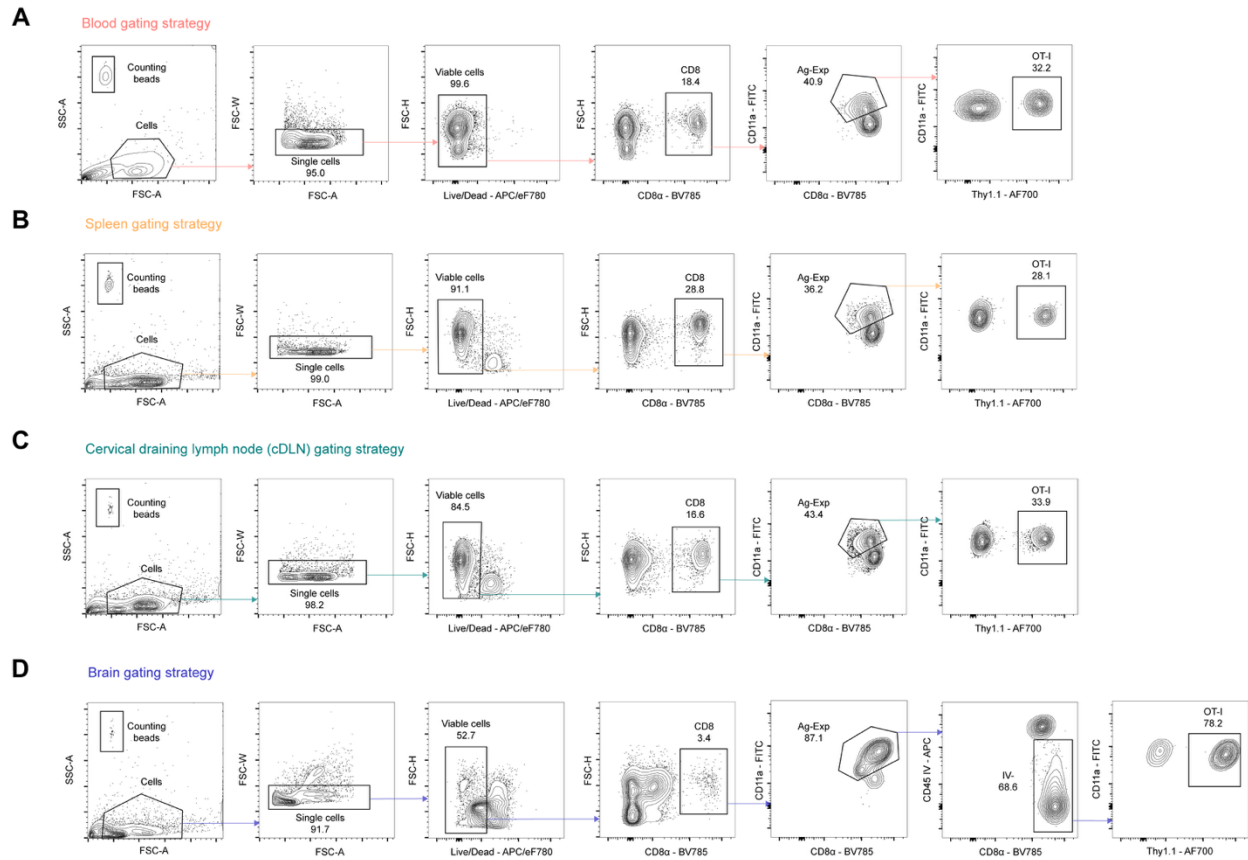

**Supplemental Figure 8. Representative gating strategy for CD8<sup>+</sup> T cell populations in tissues.** (A) Representative gating strategy for Ag-Exp CD8<sup>+</sup> T cells and/or TCR-tg CD8<sup>+</sup> T cells in the blood, (B) spleen, (C) cervical draining lymph nodes, and (D) IV- brain.

### Thymus gating strategy

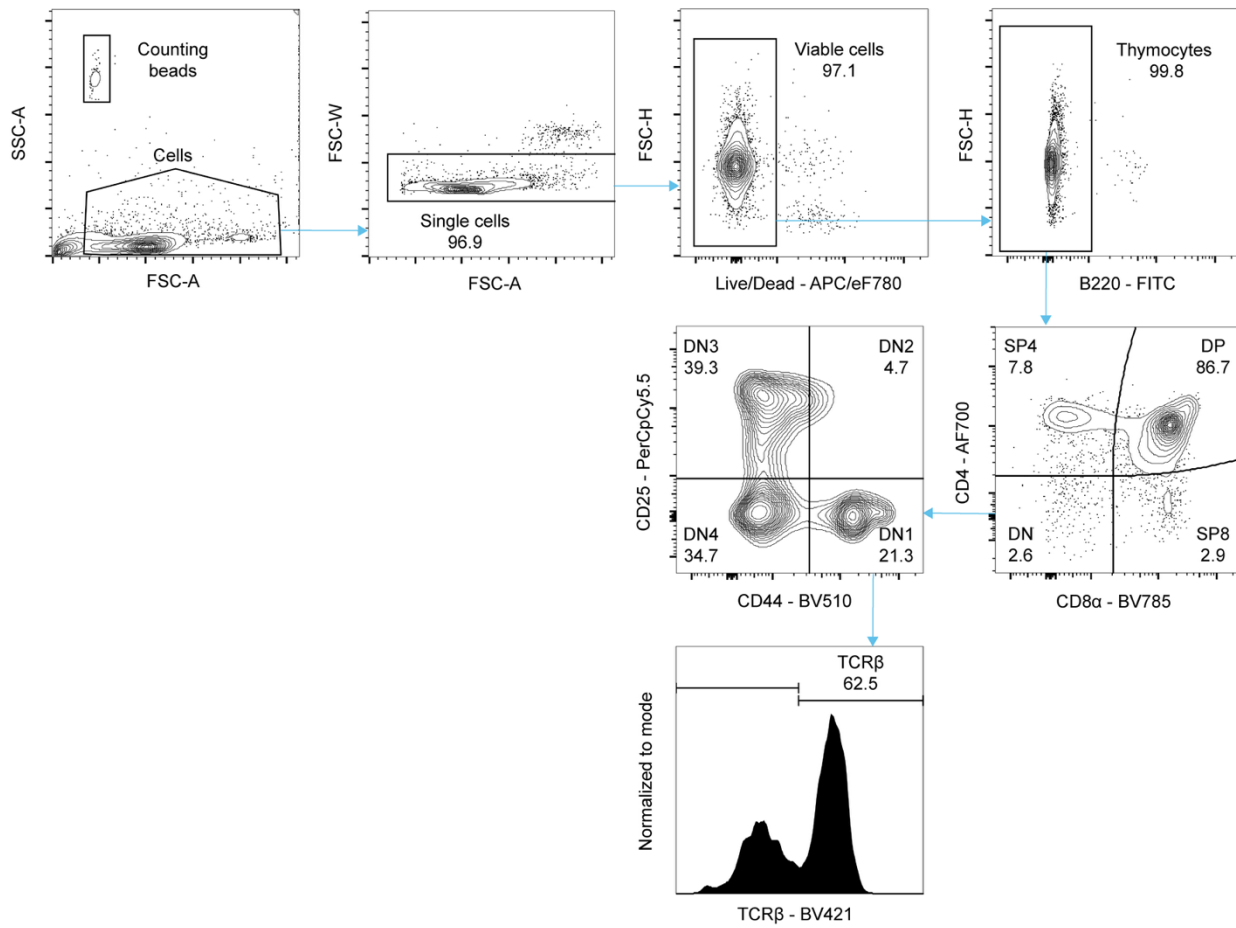

**Supplemental Figure 9. Representative gating strategy for thymocytes.** Representative gating strategy for thymocyte characterization.

## Supplemental Tables.

**Supplemental Table 1. Key resource table.**

| REAGENT or RESOURCE                     | SOURCE         | IDENTIFIER                       |
|-----------------------------------------|----------------|----------------------------------|
| <b>Antibodies</b>                       |                |                                  |
| BV785 anti-mouse CD8 $\alpha$ (53-6.7)  | BioLegend      | Cat #100750; RRID: AB_2562610    |
| AlexaFluor700 anti-mouse CD90.1 (OX-7)  | BioLegend      | Cat #202528; RRID: AB_1626241    |
| PerCPCy5.5 anti-mouse CD90.1 (OX-7)     | BioLegend      | Cat #202516; RRID: AB_961437     |
| FITC anti-mouse CD90.1 (OX-7)           | BioLegend      | Cat #202504; RRID: AB_1595653    |
| FITC anti-mouse CD11a (2D7)             | BioLegend      | Cat # 101106; RRID: AB_312779    |
| BV510 anti-mouse CD11a (2D7)            | BD Biosciences | Cat #740110; RRID: AB_2739868    |
| PE anti-mouse V $\alpha$ 2 (B20.1)      | BioLegend      | Cat #127808; RRID: AB_1134183    |
| APC anti-mouse CD45 (30-F11)            | BioLegend      | Cat #103112; RRID: AB_312977     |
| Pacific Blue anti-mouse CD45 (30-F11)   | BioLegend      | Cat #103126; RRID: AB_493535     |
| Pacific Blue anti-mouse CD45.2 (104)    | BioLegend      | Cat #109820; RRID: AB_492872     |
| BV421 anti-mouse CD45.2 (104)           | BioLegend      | Cat #109832; RRID: AB_2565511    |
| PE/CF594 anti-mouse CD69 (H1.2F3)       | BD Biosciences | Cat #562455; RRID: AB_11154217   |
| BB700 anti-mouse CD49a (Ha31/8)         | BD Biosciences | Cat #742164; RRID: AB_2861198    |
| PE anti-mouse CD103 (2E 7)              | BioLegend      | Cat #121406; RRID: AB_1133989    |
| PECy7 anti-mouse CXCR6 (SA051D1)        | BioLegend      | Cat #151119; RRID: AB_2721670    |
| BV421 anti-mouse PD-1 (29F.1A12)        | BioLegend      | Cat #135221; RRID: AB_2562568    |
| PE anti-mouse PD-1 (29F.1A12)           | BioLegend      | Cat #135206; RRID: AB_1877231    |
| BV510 anti-mouse CD62L (MEL-14)         | BioLegend      | Cat #104441; RRID: AB_2561537    |
| PE anti-mouse CX3CR1 (SA011F11)         | BioLegend      | Cat #149006; RRID: AB_2564315    |
| BV421 anti-mouse IFN- $\gamma$ (XMG1.2) | BioLegend      | Cat #505830; RRID: AB_2563105    |
| PECy7 anti-mouse TNF (MP6-XT22)         | BioLegend      | Cat #506324; RRID: AB_2256076    |
| PE anti-mouse CD107a (1D4B)             | BioLegend      | Cat #121612; RRID: AB_2134487    |
| AlexaFluor700 anti-mouse CD4 (GK1.5)    | eBioscience    | Cat #56-0041-82; RRID: AB_493999 |
| FITC anti-mouse CD4 (H129.19)           | BioLegend      | Cat #130308; RRID: AB_1279237    |

|                                                                                                                         |                |                                   |
|-------------------------------------------------------------------------------------------------------------------------|----------------|-----------------------------------|
| BV510 anti-mouse B220 (RA3-6B2)                                                                                         | BioLegend      | Cat #103248; RRID: AB_2650679     |
| FITC anti-mouse B220 (RA3-6B2)                                                                                          | eBioscience    | Cat #11-0452-82; RRID: AB_465054  |
| AlexaFluor700 anti-mouse Ly6G (1A8)                                                                                     | BioLegend      | Cat #127622; RRID: AB_10643269    |
| PE anti-mouse Ly6C (HK1.4)                                                                                              | BioLegend      | Cat #128008; RRID: AB_1186132     |
| PerCpCy5.5 anti-mouse Ly6C (HK1.4)                                                                                      | BioLegend      | Cat #128012; RRID: AB_1659241     |
| PEdazzle594 anti-mouse CD11c (N418)                                                                                     | BioLegend      | Cat #117347; RRID: AB_2563654     |
| PECy7 anti-mouse CD11b (M1/70)                                                                                          | BioLegend      | Cat #101216; RRID: AB_312799      |
| PE anti-mouse NK1.1 (PK136)                                                                                             | BioLegend      | Cat #108708; RRID: 108708         |
| PE anti-mouse NKp46 (29A1.4)                                                                                            | BioLegend      | Cat #137604; RRID: AB_2235755     |
| BV510 anti-mouse CD44 (IM7)                                                                                             | BioLegend      | Cat #103043; RRID: AB_2561391     |
| PerCpCy5.5 anti-mouse CD25 (PC61)                                                                                       | BioLegend      | Cat #102030; RRID: AB_893291      |
| BV421 anti-mouse TCR $\beta$ (H57-597)                                                                                  | BioLegend      | Cat #109230; RRID: AB_10933263    |
| PE anti-mouse CD5 (53-7.3)                                                                                              | BioLegend      | Cat #100608; RRID: AB_312737      |
| PECy7 anti-mouse CD69 (H1.2F3)                                                                                          | BioLegend      | Cat #104512; RRID: AB_493564      |
| AF647 anti-mouse CD31 (MEC13.3)                                                                                         | BioLegend      | Cat #102516; RRID: AB_2161029     |
| APC anti-mouse Ki-67 (SolA15)                                                                                           | Thermo Fisher  | Cat #17-5698-82; RRID: AB_2688057 |
| FITC anti-mouse Granzyme B (GB11)                                                                                       | BioLegend      | Cat #515403; RRID: AB_2114575     |
| BV510 anti-mouse TIM-3 (5D12)                                                                                           | BD Biosciences | Cat #747625; RRID: AB_2744191     |
| APC/eF780 fixable viability stain                                                                                       | BD Biosciences | Cat #565388; RRID: AB_2869673     |
| H2-D <sup>p</sup> TRP <sub>1455-463</sub>                                                                               | Harty lab      | NA                                |
| H2-K <sup>p</sup> TRP <sub>2180-188</sub>                                                                               | Harty lab      | NA                                |
| H2-D <sup>p</sup> GP100 <sub>25-33</sub>                                                                                | Harty lab      | NA                                |
| H2-D <sup>p</sup> NP <sub>366-374</sub>                                                                                 | Harty lab      | NA                                |
| H2-D <sup>p</sup> PA <sub>224-233</sub>                                                                                 | Harty lab      | NA                                |
| H2-K <sup>p</sup> OVA <sub>257-264</sub>                                                                                | Harty lab      | NA                                |
| $\alpha$ -Thy1.1 (19E12)                                                                                                | BioXCell       | Cat #BE0214; RRID: AB_2687700     |
| $\alpha$ -GR-1 (NIMP-R14)                                                                                               | BioXCell       | Cat #BE0320; RRID: AB_2819047     |
| $\alpha$ -PD-L1 (10F.9G2)                                                                                               | BioXCell       | Cat #BE0101; RRID: AB_10949073    |
| <b>Bacterial and virus strains</b>                                                                                      |                |                                   |
| <i>Listeria monocytogenes</i> expressing -OVA <sub>257-264</sub> , attenuated ( $\Delta$ actA, $\Delta$ inlB-deficient) | Harty lab      | NA                                |

|                                                                                                                          |                |                   |
|--------------------------------------------------------------------------------------------------------------------------|----------------|-------------------|
| <i>Listeria monocytogenes</i> expressing -GP <sub>33-41</sub> , attenuated ( $\Delta$ actA, $\Delta$ inlB-deficient)     | Harty lab      | NA                |
| <i>Listeria monocytogenes</i> expressing -TRP <sub>2180-188</sub> , attenuated ( $\Delta$ actA, $\Delta$ inlB-deficient) | Harty lab      | NA                |
| <i>Listeria monocytogenes</i> expressing -PA <sub>224-233</sub> , attenuated ( $\Delta$ actA, $\Delta$ inlB-deficient)   | Harty lab      | NA                |
| Lymphocytic choriomeningitis virus (LCMV) strain Armstrong                                                               | Harty lab      | NA                |
| <b>Chemicals, peptides, and recombinant proteins</b>                                                                     |                |                   |
| ACK lysis buffer                                                                                                         | Harty lab      | NA                |
| Vitalyse                                                                                                                 | CMDG           | Cat #WBL0100      |
| Collagenase D                                                                                                            | Sigma Aldrich  | Cat #11088866001  |
| Collagenase II                                                                                                           | Sigma Aldrich  | Cat #17101015     |
| Liver digestion buffer                                                                                                   | Gibco          | Cat #17703034     |
| DNase I                                                                                                                  | Sigma Aldrich  | Cat #D4513-1VL    |
| Percoll                                                                                                                  | GE Healthcare  | Cat #17-0891-01   |
| Hepes                                                                                                                    | Gibco          | Cat #15630080     |
| DPBS                                                                                                                     | Gibco          | Cat #14190144     |
| RPMI                                                                                                                     | Gibco          | Cat #11875093     |
| DMEM                                                                                                                     | Gibco          | Cat #11965092     |
| HBSS                                                                                                                     | Gibco          | Cat #14025092     |
| FACS Buffer                                                                                                              | Harty lab      | NA                |
| 0.25% Trypsin-EDTA                                                                                                       | Gibco          | Cat #25200056     |
| TrypLE™ Express Enzyme                                                                                                   | Gibco          | Cat #12604013     |
| Nuclease-free water                                                                                                      | Thermo Fisher  | Cat #AM9937       |
| Brefeldin A                                                                                                              | BioLegend      | Cat #420601       |
| 24.2G Fc Block                                                                                                           | Harty lab      | NA                |
| FACS Buffer                                                                                                              | Harty lab      | NA                |
| Cytofix Fixation Buffer                                                                                                  | BD Bioscience  | Cat #554655       |
| Igopal                                                                                                                   | Sigma Aldrich  | Cat #56741        |
| Tryptic Soy Broth                                                                                                        | BD Bioscience  | Cat #BA-257107.06 |
| Methylcellulose                                                                                                          | Sigma Aldrich  | Cat #M7027        |
| Low melting point agarose                                                                                                | Promega        | Cat #V2111        |
| ProLong™ Gold Antifade Mountant with DAPI                                                                                | Thermo Fisher  | Cat #P36935       |
| Lipopolysaccharide                                                                                                       | Sigma Aldrich  | Cat # L8274       |
| Triton™ X-100                                                                                                            | Sigma Aldrich  | Cat #X100         |
| VivoGlo™ D-luciferin                                                                                                     | Promega        | Cat #P1043        |
| Ψ UTP                                                                                                                    | Thermo Fisher  | Cat #N-1019-1     |
| 5-M CTP                                                                                                                  | Thermo Fisher  | Cat #N-1014-1     |
| LipidFlex lipid formulation                                                                                              | PreciGenome    | Cat #PG-SYN-LF1ML |
| SM-102 cationic lipid                                                                                                    | MedChemExpress | Cat #HY-134541    |
| TRP <sub>1455-463</sub>                                                                                                  | Global Peptide | TAPDNLGYM         |
| TRP <sub>2180-188</sub>                                                                                                  | Global Peptide | SVYDFFVWL         |
| GP <sub>10025-33</sub>                                                                                                   | Global Peptide | KVPRNQDWL         |
| OVA <sub>257-264</sub>                                                                                                   | Global Peptide | SIINFEKL          |
| NP <sub>366-374</sub>                                                                                                    | Global Peptide | ASNENMETM         |
| PA <sub>224-233</sub>                                                                                                    | Global Peptide | SSELENFRAYV       |
| GP <sub>33-41</sub>                                                                                                      | Global Peptide | KAVYNFATC         |
| Streptavidin-APC                                                                                                         | Thermo Fisher  | Cat #S868         |

|                                                                                                |                                            |                                                                                                                                                                       |
|------------------------------------------------------------------------------------------------|--------------------------------------------|-----------------------------------------------------------------------------------------------------------------------------------------------------------------------|
| Streptavidin-PE                                                                                | Thermo Fisher                              | Cat #S866                                                                                                                                                             |
| Streptavidin-FITC                                                                              | Thermo Fisher                              | Cat #S869                                                                                                                                                             |
| Streptavidin-BV421                                                                             | BioLegend                                  | Cat #405225                                                                                                                                                           |
| <b>Critical commercial assays</b>                                                              |                                            |                                                                                                                                                                       |
| CountBright™ Absolute Counting Beads, for flow cytometry                                       | Thermo Fisher                              | Cat #C36950                                                                                                                                                           |
| FoxP3 / Transcription Factor Staining Kit                                                      | Tonbo / Cytex                              | Cat #SKU TNB-0607-KIT                                                                                                                                                 |
| CD11c Microbeads UltraPure                                                                     | Miltenyi Biotec                            | Cat #130-125-835                                                                                                                                                      |
| ARCA T7 mRNA Synthesis Kit                                                                     | NEB                                        | Cat #E2065                                                                                                                                                            |
| RNeasy Mini Kit                                                                                | Qiagen                                     | Cat #74104                                                                                                                                                            |
| Quant-iT™ Ribogreen® Assay Kit                                                                 | Thermo Fisher                              | Cat #R11490                                                                                                                                                           |
| <b>Experimental models: Cell lines</b>                                                         |                                            |                                                                                                                                                                       |
| B16 F10 melanoma cell line                                                                     | Harty lab                                  | NA                                                                                                                                                                    |
| B16-OVA F10 melanoma cell line                                                                 | Lyse Norian lab<br>(University of Alabama) | NA                                                                                                                                                                    |
| B16-GP33 F10 melanoma cell line                                                                | Ryan Zander lab<br>(University of Iowa)    | NA                                                                                                                                                                    |
| GL261-quad cassette-luciferase glioblastoma cell                                               | Aaron Johnson lab<br>(Mayo Clinic)         | NA                                                                                                                                                                    |
| <b>Experimental models: Organisms/strains</b>                                                  |                                            |                                                                                                                                                                       |
| C57BL/6N                                                                                       | Charles River                              | 000027                                                                                                                                                                |
| OT-I                                                                                           | Jackson Laboratories                       | 003831                                                                                                                                                                |
| P14                                                                                            | Jackson Laboratories                       | 037394                                                                                                                                                                |
| Thy1.1                                                                                         | Jackson Laboratories                       | 000406                                                                                                                                                                |
| OT-I Thy1.1                                                                                    | Harty Lab                                  | NA                                                                                                                                                                    |
| P14 Thy1.1                                                                                     | Harty Lab                                  | NA                                                                                                                                                                    |
| TCRβKO                                                                                         | Jackson Laboratories /<br>Butler Lab       | 002118                                                                                                                                                                |
| <b>Recombinant DNA</b>                                                                         |                                            |                                                                                                                                                                       |
| pMRNAxp mRNAExpress vector for in vitro transcription                                          | System Bio                                 | Cat #MR000PA-1                                                                                                                                                        |
| <b>Software and algorithms</b>                                                                 |                                            |                                                                                                                                                                       |
| FlowJo v10.10.1 (with Downsample and UMAP plug-ins)                                            | FlowJo, LLC                                | <a href="https://www.flowjo.com/solutions/flowjo/">https://www.flowjo.com/solutions/flowjo/</a>                                                                       |
| Xenogen Living Image software                                                                  | Caliper Life Sciences                      | <a href="https://www.revvyty.com/product/spectrum-200-living-image-v4series-1-128113">https://www.revvyty.com/product/spectrum-200-living-image-v4series-1-128113</a> |
| Adobe Illustrator v24.0.1                                                                      | Adobe                                      | <a href="https://www.adobe.com/products/illustrator.html">https://www.adobe.com/products/illustrator.html</a>                                                         |
| Prism 10.1.1                                                                                   | GraphPad Software                          | <a href="https://www.graphpad.com/features">https://www.graphpad.com/features</a>                                                                                     |
| <b>Other</b>                                                                                   |                                            |                                                                                                                                                                       |
| 70 μm Filters                                                                                  | Thermo Fisher                              | Cat #22-363-548                                                                                                                                                       |
| Ethicon Perma-Hand Silk Suture, Size 4-0, 18"                                                  | Thermo Fisher                              | Cat #683G                                                                                                                                                             |
| Ethicon Coated Vicryl Suture, Size 5-0, 18"                                                    | Thermo Fisher                              | Cat #J493G                                                                                                                                                            |
| Vetbond                                                                                        | 3M                                         | Cat #B00016067                                                                                                                                                        |
| Hamilton 25 μL Microliter Syringe Model 702 N, Cemented Needle, 22s gauge, 2 in, point style 2 | Hamilton                                   | Cat #80400                                                                                                                                                            |

|                                        |               |                |
|----------------------------------------|---------------|----------------|
| BD 1 mL Micro-Fine™ IV Insulin Syringe | Thermo Fisher | Cat #14-829-1A |
| BD 1 mL TB Syringe                     | Thermo Fisher | Cat #309623    |
| Vernier calipers                       | Thermo Fisher | Cat #S90343    |

**Supplemental Table 2. mRNA vaccine amino acid and coding sequences.**

| <b>Vaccine components</b> |                                                                                                                                                                                                                                                                                                                                                                                                                                                                                                                                                                                                                                                                                                                                                                                                                                                                                                        |
|---------------------------|--------------------------------------------------------------------------------------------------------------------------------------------------------------------------------------------------------------------------------------------------------------------------------------------------------------------------------------------------------------------------------------------------------------------------------------------------------------------------------------------------------------------------------------------------------------------------------------------------------------------------------------------------------------------------------------------------------------------------------------------------------------------------------------------------------------------------------------------------------------------------------------------------------|
| Coding sequences          | <p>Kozak sequence: <b>GCCACC</b></p> <p>Ub-A76:<br/> <b>ATGCAGATCTTCGTGAAGACCCTGACCGGCAAGACCATCACCCCTGGAG<br/> GTGGAGCCCAGTGACACCATCGAGAACGTGAAGGCCAAGATCCAGGA<br/> TAAAGAGGGCATCCCCCTGACCAGCAGAGGCTGATCTTTGCCGGCA<br/> AGCAGCTGGAAGATGGCCGCACCCTCTCTGATTACAACATCCAGAAAG<br/> AGTCAACCCTGCACCTGGTCCTCCGTCTGAGGGGTGCC</b></p> <p>Flexible linker: <b>GTAGGAAAAGGTGGTTCAGGAGGC</b></p> <p>Proteasome recognition spacers: GCTGCTTAT</p> <p>TRP1<sub>455-463</sub>: <b>ACTGCTCCAGACAACCTGGGATACATG</b></p> <p>TRP2<sub>180-188</sub>: <b>AGTGTTTATGATTTTTTTGTGTGGCTC</b></p> <p>GP100<sub>25-33</sub>: <b>AAAGTACCCAGAAACCAGGACTGGCTT</b></p> <p>OVA<sub>257-264</sub>: <b>AGTATAATCAACTTTGAAAACTG</b></p> <p>NP<sub>366-374</sub>: <b>GCTTCCAATGAAAATATGGAGACTATG</b></p> <p>PA<sub>224-233</sub>: <b>TCCAGCCTTGAAAATTTAGAGCCTATGTG</b></p> <p>GP<sub>33-41</sub>: <b>AAAGCTGTGTACAATTCGCCACCATG</b></p> |
| Amino acid sequence       | <p>Ub-A76:<br/> <b>MQIFVKLTGKITLEVEPSDTIENVKAKIQDKEGIPPDQQLIFAGKQLEDG<br/> RTLSDYNIQKESTLHLVLRLRGA</b></p> <p>Flexible linker: <b>VGKGGSGG</b></p> <p>Proteasome recognition spacers: AAY</p> <p>TRP1<sub>455-463</sub>: <b>TAPDNLGYM</b></p> <p>TRP2<sub>180-188</sub>: <b>SVYDFVWL</b></p> <p>GP100<sub>25-33</sub>: <b>KVPRNQDWL</b></p> <p>OVA<sub>257-264</sub>: <b>SIINFEKL</b></p> <p>NP<sub>366-374</sub>: <b>ASNENMETM</b></p> <p>PA<sub>224-233</sub>: <b>SSELENFRAYV</b></p> <p>GP<sub>33-41</sub>: <b>KAVYNFATM</b></p>                                                                                                                                                                                                                                                                                                                                                                    |
| <b>UbMel-OVA vaccine</b>  |                                                                                                                                                                                                                                                                                                                                                                                                                                                                                                                                                                                                                                                                                                                                                                                                                                                                                                        |
| Coding sequence           | <p><b>GCCACCATGCAGATCTTCGTGAAGACCCTGACCGGCAAGACCATCACCC<br/> CTGGAGGTGGAGCCCAGTGACACCATCGAGAACGTGAAGGCCAAGAT<br/> CCAGGATAAAGAGGGCATCCCCCTGACCAGCAGAGGCTGATCTTTG<br/> CCGGCAAGCAGCTGGAAGATGGCCGCACCCTCTCTGATTACAACATCC<br/> AGAAAGAGTCAACCCTGCACCTGGTCCTCCGTCTGAGGGGTGCCGTA<br/> GGAAAAGGTGGTTCAGGAGGCGCTGCTTATACTGCTCCAGACAACCTG<br/> GGATACATGGCTGCTTATAGTGTGTTTATGATTTTTTTGTGTGGCTCGCTG<br/> CTTATAAAGTACCCAGAAACCAGGACTGGCTTGTGCTTATAGTATAAT<br/> CAACTTTGAAAACTGGCTGCTTATTAG</b></p>                                                                                                                                                                                                                                                                                                                                                                                                              |

|                           |                                                                                                                                                                                                                                                                                                                                                                                                                         |
|---------------------------|-------------------------------------------------------------------------------------------------------------------------------------------------------------------------------------------------------------------------------------------------------------------------------------------------------------------------------------------------------------------------------------------------------------------------|
| Amino acid sequence       | MQIFVKTLTGKTITLEVEPSDTIENVKAKIQDKEGIPPDQQRLIFAGKQLEDG<br>RTLSDYNIQKESTLHLVLRRLRGAVGKGGSGAAYTAPDNLGYMAAYSVD<br>FFVWLAAYKVPRNQDWLAAYSIINFEKLAAY                                                                                                                                                                                                                                                                           |
| <b>UbFlu-GP33 vaccine</b> |                                                                                                                                                                                                                                                                                                                                                                                                                         |
| Coding sequence           | GCCACCATGCAGATCTTCGTGAAGACCCTGACCGGCAAGACCATCACC<br>CTGGAGGTGGAGCCCAGTGACACCATCGAGAACGTGAAGGCCAAGAT<br>CCAGGATAAAGAGGGGCATCCCCCTGACCAGCAGAGGCTGATCTTTG<br>CCGGCAAGCAGCTGGAAGATGGCCGCACCCTCTCTGATTACAACATCC<br>AGAAAGAGTCAACCCTGCACCTGGTCCTCCGTCTGAGGGGTGCCGTA<br>GGAAAAGGTGGTTCAGGAGGCGCTGCTTATGCTTCCAATGAAAATATG<br>GAGACTATGGCTGCTTATTCCAGCCTTGAAAATTTAGAGCCTATGTG<br>GCTGCTTATAAAGCTGTGTACAATTCGCCACCATGGCTGCTTATTAG |
| Amino acid sequence       | MQIFVKTLTGKTITLEVEPSDTIENVKAKIQDKEGIPPDQQRLIFAGKQLEDG<br>RTLSDYNIQKESTLHLVLRRLRGAVGKGGSGAAYASNENMETMAAYSSLE<br>NFRAYVAAYKAVYNFATMAAY                                                                                                                                                                                                                                                                                    |
